# Supplementary material for: Highly efficient, deep-red organic light-emitting devices using energy transfer from exciplexes
Source: Royal Society of Chemistry journal article supplement (doi:10.1039/c6tc04979f), 2017-01-01
Supplement: c6tc04979f1.pdf [file c6tc04979f1.pdf]

## Supporting information

### Highly Efficient, Deep-Red Organic Light-Emitting Devices Using Energy Transfer from Exciplexes

Yuji Nagai,<sup>a</sup> Hisahiro Sasabe,<sup>\*a,b</sup> Jun Takahashi,<sup>a</sup> Natsuki Onuma,<sup>a</sup> Takashi Ito,<sup>a</sup> Satoru Ohisa<sup>a,b</sup> and Junji Kido<sup>\*a,b</sup>

*a. Department of Organic Materials Science, Graduate School of Organic Materials Science, Yamagata University, 4-3-16 Jonan, Yonezawa, Yamagata, 992-8510 Japan.*

*b. Research Center for Organic Electronics (ROEL), Frontier Center for Organic Materials (FROM) Yamagata University, 4-3-16 Jonan, Yonezawa, Yamagata, 992-8510 Japan.*

*E-mail: h-sasabe@yz.yamagata-u.ac.jp; kid@yz.yamagata-u.ac.jp*

#### General Considerations:

Quantum chemical calculations were performed using the hybrid DFT functional Becke and Hartree-Fock exchange and Lee Yang and Parr correlation (B3LYP) as implemented by the Gaussian 09 program packages. Electrons were described by the Pople's 6-31G(d) and 6-311+G(d,p) basis sets for molecular structure optimization and single-point energy calculations, respectively. <sup>1</sup>H NMR spectrum was recorded on JEOL 400 (400 MHz) spectrometer. Mass spectrum was obtained using a JEOL JMS-K9 mass spectrometer. DSC was performed using a Perkin-Elmer Diamond DSC Pyris instrument under nitrogen atmosphere at a heating rate of 10 °C min<sup>-1</sup>. TGA was undertaken using a SEIKO EXSTAR 6000 TG/DTA 6200 unit under nitrogen atmosphere at a heating rate of 10 °C min<sup>-1</sup>. UV-vis spectra was measured using a Shimadzu UV-3150 UV-vis-NIR spectrophotometer. Photoluminescence spectra were measured using a FluoroMax-2 (Jobin-Yvon-Spex) luminescence spectrometer. The *I<sub>p</sub>* was determined by a PYS under the vacuum (=10<sup>-3</sup> Pa). Transient PL decay curves and time resolved photoluminescence spectra were measured by using a streak camera (C4334 from Hamamatsu Photonics) at 5 K and 300 K.

#### Device Fabrication and Characterization:

The substrates were cleaned with ultrapurified water and organic solvents, and then dry-cleaned for 30 minutes by exposure to UV-ozone. The organic layers were deposited onto the ITO substrates under the vacuum (=10<sup>-5</sup> Pa), successively. LiF and Al was patterned using a shadow mask with an array of 2 mm × 2 mm openings without breaking the vacuum (=10<sup>-5</sup> Pa). The electroluminescent (EL) were taken using an optical multichannel analyzer Hamamatsu Photonics PMA-11. The current density-voltage and

luminance–voltage characteristics were measured by using a Keithley source measure unit 2400 and a Minolta CS200 luminance meter, respectively.

### Synthetic Procedure:

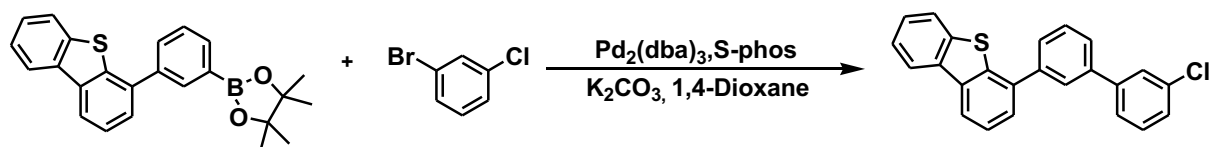

Scheme S1

### 4-(3'-chloro-[1,1'-biphenyl]-3-yl)dibenzo[b,d]thiophene:

(3-(dibenzo[b,d]thiophen-4-yl)phenyl)boronic acid (0.82 g, 2.7 mmol), 1-bromo-3-chlorobenzene (0.34 g, 3.0 mmol), and K<sub>2</sub>CO<sub>3</sub> aq (0.74 g, 5.4 mmol) were added to a round bottom flask. 1,4-dioxane (20 mL) was added, and nitrogen was bubbled through the mixture for 1 hour. Then, Pd<sub>2</sub>(dba)<sub>3</sub> (40 mg, 0.05 mmol) and S-phos (40 mg, 0.10 mmol) were added and the resultant mixture was stirred for 1 hours at reflux temperature under N<sub>2</sub> flow. The mixture was extracted CHCl<sub>3</sub> (4 × 10 mL), and washed with brine, dried over anhydrous MgSO<sub>4</sub>, filtered, and evaporated to dryness. The resulting solid was purified by chromatography on silica gel (eluent: hexanes→hexanes/CHCl<sub>3</sub> = 8/1) to afford 4-(3'-chloro-[1,1'-biphenyl]-3-yl)dibenzo[b,d]thiophene (0.99 g, 93%) as a colorless viscous oil: <sup>1</sup>H-NMR (400MHz, DMSO-d<sub>6</sub>) : δ = 8.44–8.35 (m, 2H), 8.08–7.91 (m, 2H), 7.84–7.70 (m, 4H), 7.69–7.58 (m, 3H), 7.54–7.39 (m, 4H) ppm.

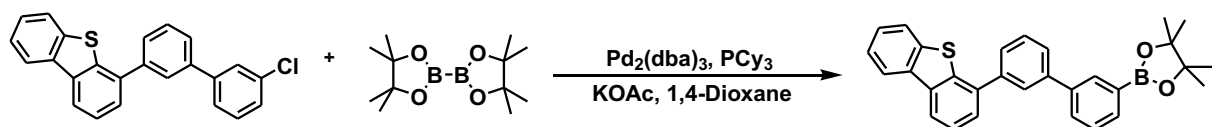

Scheme S2

### 2-(3'-dibenzo[b,d]thiophen-4-yl)-[1,1'-biphenyl]-3-yl)-4,4,5,5-tetramethyl-1,3,2-dioxaborolane:

4-(3'-chloro-[1,1'-biphenyl]-3-yl)dibenzo[b,d]thiophene (3.70 g, 9.97 mmol), 4,4,4',4',5,5,5',5'-octamethyl-2,2'-bi(1,3,2-dioxaborolane) (3.79 g, 14.9 mmol), and KOAc (2.93 g, 29.9 mmol) were added to a round bottom flask. 1,4-dioxane (40 mL) was added, and nitrogen was bubbled through the mixture for 1 hour. Then, Pd<sub>2</sub>(dba)<sub>3</sub> (180 mg, 0.20 mmol) and PCy<sub>3</sub> (110 mg, 0.40 mmol) were added and the resultant mixture was stirred for 12 hours at reflux temperature under N<sub>2</sub> flow. The mixture was extracted CHCl<sub>3</sub> (4 × 20

mL), and washed with brine, dried over anhydrous  $\text{MgSO}_4$ , filtered, and evaporated to dryness. The resulting solid was purified by chromatography on silica gel (eluent: hexanes $\rightarrow$ hexanes/ $\text{CHCl}_3$  = 10/1) to afford **2-(3'-dibenzo[*b,d*]thiophen-4-yl)-[1,1'-biphenyl]-3-yl)-4,4,5,5-tetramethyl-1,3,2-dioxaborolane** (3.20 g, 69%) as a white solid:  $^1\text{H-NMR}$  (400MHz,  $\text{CDCl}_3$ ) :  $\delta$  = 8.24–8.14 (m, 2H), 8.12 (s, 1H), 7.99 (s, 1H), 7.87–7.75 (m, 3H), 7.72 (dd,  $J$  = 5.7, 1.6 Hz, 2H), 7.63–7.40 (m, 6H), 1.39–1.29 (m, 12H) ppm.

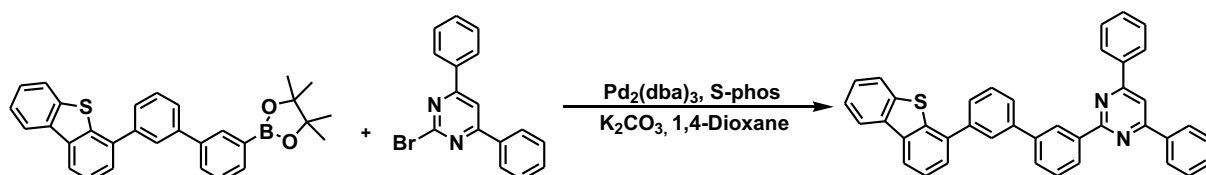

**Scheme S3**

**2-(3'-dibenzo[*b,d*]thiophen-4-yl)-[1,1'-biphenyl]-3-yl)-4,6-diphenylpyrimidine (4DBT46PM):**

2-(3'-dibenzo[*b,d*]thiophen-4-yl)-[1,1'-biphenyl]-3-yl)-4,4,5,5-tetramethyl-1,3,2-dioxaborolane (1.00 g, 2.16 mmol), 2-bromo-4,6-diphenylpyrimidine (0.74 g, 2.37 mmol), and  $\text{K}_2\text{CO}_3$  aq (0.59 g, 4.32 mmol) were added to a round bottom flask. 1,4-dioxane (15 mL) was added, and nitrogen was bubbled through the mixture for 1 hour. Then,  $\text{Pd}_2(\text{dba})_3$  (30 mg, 0.04 mmol) and S-phos (20 mg, 0.08 mmol) were added and the resultant mixture was stirred for 1 hours at reflux temperature under  $\text{N}_2$  flow. The mixture was extracted EtOAc (4  $\times$  20 mL), and washed with brine, dried over anhydrous  $\text{MgSO}_4$ , filtered, and evaporated to dryness. The resulting solid was purified by chromatography on silica gel (eluent:  $\text{CHCl}_3$ ) to afford **2-(3'-dibenzo[*b,d*]thiophen-4-yl)-[1,1'-biphenyl]-3-yl)-4,6-diphenylpyrimidine** (0.89 g, 72%) as a white solid:  $^1\text{H-NMR}$  (400MHz,  $\text{CDCl}_3$ ) :  $\delta$  = 9.07 (t,  $J$  = 1.6 Hz, 1H), 8.75 (dd,  $J$  = 7.7, 1.4 Hz, 1H), 8.36–8.29 (m, 4H), 8.25–8.16 (m, 3H), 8.07 (s, 1H), 7.88–7.74 (m, 4H), 7.72–7.41 (m, 12H) ppm;  $^{13}\text{C-NMR}$  (100 MHz,  $\text{CDCl}_3$ ) :  $\delta$  = 164.82, 164.46, 141.83, 141.18, 141.09, 139.80, 138.81, 138.70, 137.48, 136.92, 136.31, 135.79, 130.79, 129.54, 129.37, 129.00, 128.95, 127.69, 127.39, 127.30, 127.25, 127.02, 126.97, 126.78, 125.16, 124.38, 122.72, 121.72, 120.57, 110.47ppm; MS:  $m/z$  = 567  $[\text{M}]^+$ ; Anal calcd for  $\text{C}_{40}\text{H}_{26}\text{N}_2\text{S}$ : C, 84.77; H, 4.62; N, 4.94; S, 5.66%. Found: C, 84.79; H, 4.62; N, 4.72; S, 5.35%; HPLC analysis for 99.6% (eluent: THF/ $\text{H}_2\text{O}$  = 6.5/3.5).

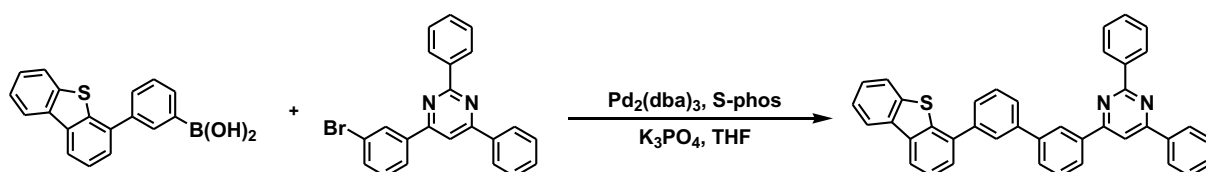

## Scheme S4

### 4-(3'-dibenzo[*b,d*]thiophen-4-yl)-[1,1'-biphenyl]-3-yl)-2,6-diphenylpyrimidine (4DBT26PM):

3-(dibenzo[*b,d*]thiophen-4-yl)phenylboronic acid (1.74 g, 4.5 mmol), 4-(3-bromophenyl)-2,6-diphenylpyrimidine (1.64 g, 5.4 mmol), and  $K_3PO_4$  aq (2.86 g, 13.5 mmol) were added to a round bottom flask. THF (20 mL) was added, and nitrogen was bubbled through the mixture for 1 hour. Then,  $Pd_2(dba)_3$  (84 mg, 0.092 mmol) and S-phos (77 mg, 0.188 mmol) were added and the resultant mixture was stirred for 1 hours at reflux temperature under  $N_2$  flow. The mixture was extracted  $CHCl_3$  ( $4 \times 10$  mL), and washed with brine, dried over anhydrous  $MgSO_4$ , filtered, and evaporated to dryness. The resulting solid was purified through silica gel pad (eluent: toluene) to afford 4-(3'-dibenzo[*b,d*]thiophen-4-yl)-[1,1'-biphenyl]-3-yl)-2,6-diphenylpyrimidine (1.5 g, 62%) as a colorless solid:  $^1H$ -NMR (400 MHz,  $CDCl_3$ )  $\delta$  = 8.78-8.71 (m, 2H), 8.58 (s, 1H), 8.34-8.27 (m, 3H), 8.23-8.17 (m, 2H), 8.14 (d,  $J$  = 1.8 Hz, 1H), 8.09 (s, 1H), 7.87 (d,  $J$  = 7.8 Hz, 1H), 7.82-7.75 (m, 3H), 7.71-7.64 (2H), 7.63-7.42 (m, 10H);  $^{13}C$ -NMR (100 MHz,  $CDCl_3$ ) :  $\delta$  = 164.79, 164.66, 164.51, 141.70, 141.35, 141.21, 139.47, 138.62, 138.21, 138.06, 137.49, 136.74, 136.34, 136.76, 130.77, 130.64, 129.63, 129.48, 129.45, 128.90, 128.46, 127.52, 127.28, 127.20, 126.91, 126.84, 126.43, 126.25, 125.19, 124.43, 122.68, 121.74, 120.64, 110.44 ppm; MS:  $m/z$  = 567  $[M]^+$ ; Anal calcd for  $C_{40}H_{26}N_2S$ : C, 84.77; H, 4.62; N, 4.94; S, 5.66%. Found: C, 84.99; H, 4.56; N, 4.91; S, 5.55%; HPLC analysis for 99.2% (eluent: THF/ $H_2O$  = 6.5/3.5).

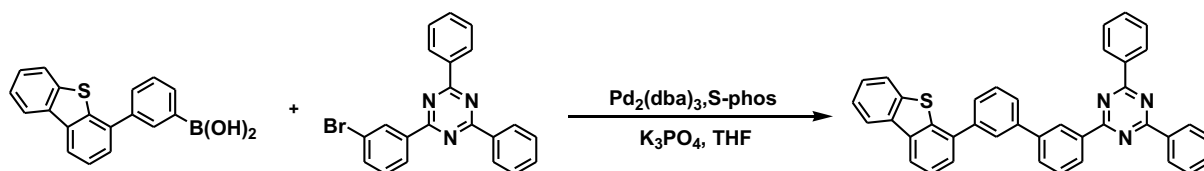

## Scheme S5

### 2-(3'-dibenzo[*b,d*]thiophen-4-yl)-[1,1'-biphenyl]-3-yl)-4,6-diphenyl-1,3,5-triazine (4DBT46TRZ):

3-(dibenzo[*b,d*]thiophen-4-yl)phenylboronic acid (1.60 g, 5.26 mmol), 2-(3-bromophenyl)-4,6-diphenyl-1,3,5-triazine (1.70 g, 4.38 mmol), and  $K_3PO_4$  aq (2.78 g, 13.1 mmol) were added to a round bottom flask. THF (30 mL) was added, and nitrogen was bubbled through the mixture for 1 hour. Then,  $Pd_2(dba)_3$  (81 mg, 0.089 mmol) and S-phos (75 mg, 0.18 mmol) were added and the resultant mixture was stirred for 1 hours at reflux temperature under  $N_2$  flow. The mixture was extracted  $CHCl_3$  ( $4 \times 10$  mL), and washed with brine, dried over anhydrous  $MgSO_4$ , filtered, and evaporated to dryness. The resulting solid was purified through silica gel pad (eluent: toluene) to afford 2-(3'-dibenzo[*b,d*]thiophen-4-yl)-[1,1'-biphenyl]-3-yl)-4,6-diphenyl-1,3,5-triazine (0.99

g, 93%) as a colorless solid:  $^1\text{H-NMR}$  (400 MHz,  $\text{CDCl}_3$ )  $\delta$  = 9.10 (s, 1H), 8.84-8.75 (m, 5H), 8.25-8.13 (m, 3H), 7.94 (d,  $J$  = 7.8 Hz, 1H), 7.87-7.76 (m, 3H), 7.69 (t,  $J$  = 7.8 Hz, 2H), 7.64-7.40 (10H);  $^{13}\text{C-NMR}$  (100 MHz,  $\text{CDCl}_3$ ) :  $\delta$  = 171.70, 171.61, 141.44, 141.38, 141.22, 139.54, 138.69, 136.91, 136.83, 136.35, 136.18, 135.80, 132.52, 131.37, 129.49, 129.21, 128.99, 128.67, 128.11, 127.76, 127.51, 127.23, 126.96, 126.83, 125.19, 124.44, 122.72, 121.75, 120.64 ppm; MS:  $m/z$  = 568  $[\text{M}]^+$  ; Anal calcd for  $\text{C}_{39}\text{H}_{25}\text{N}_3\text{S}$ : C, 82.51; H, 4.44; N, 7.40; S, 5.65%. Found: C, 82.50; H, 4.36; N, 7.31; S, 5.43%; HPLC analysis for 99.9% (eluent: THF/ $\text{H}_2\text{O}$  = 6.5/3.5).

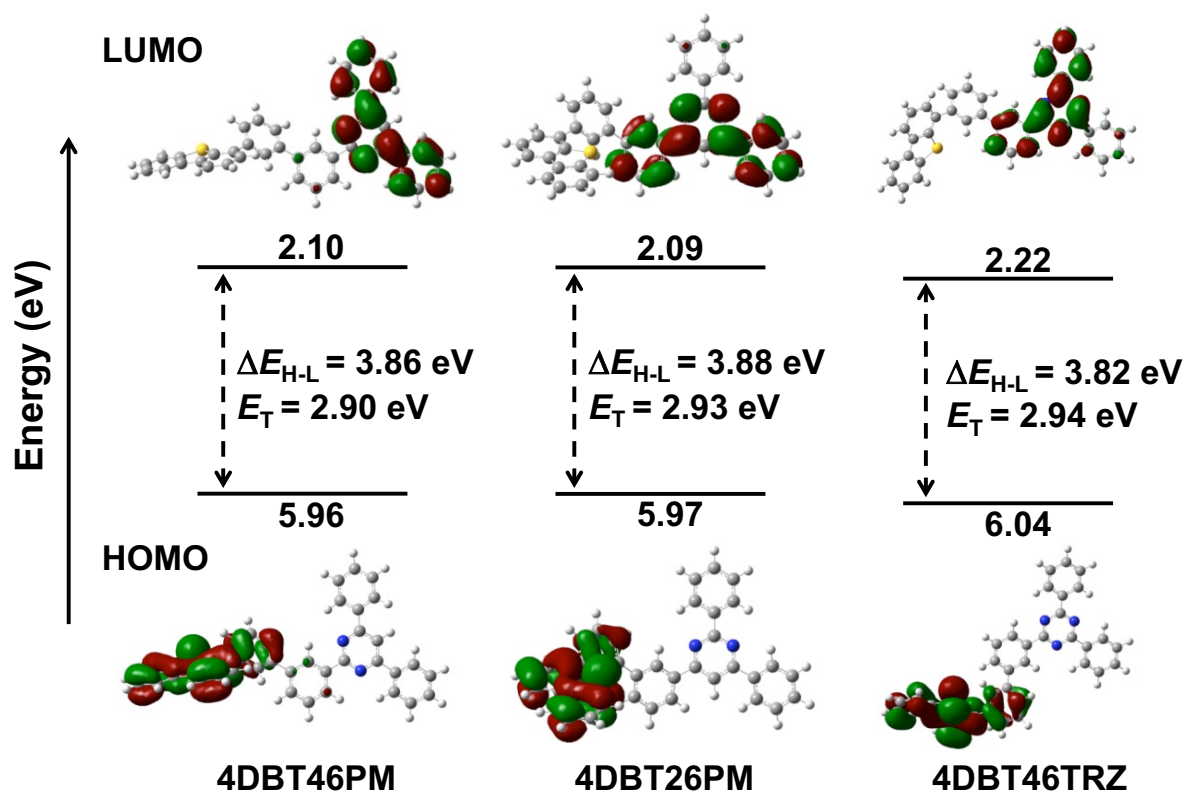

**Fig. S1** The optimized structures and the spatial distributions of the HOMOs and LUMOs for the DBT-azine derivatives calculated at the B3LYP/6-31+G(d,p)//B3LYP/6-31G(d,p) level.

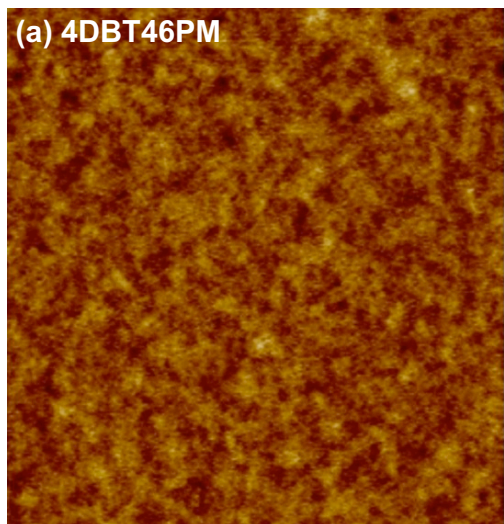

**Ra = 0.185 nm**

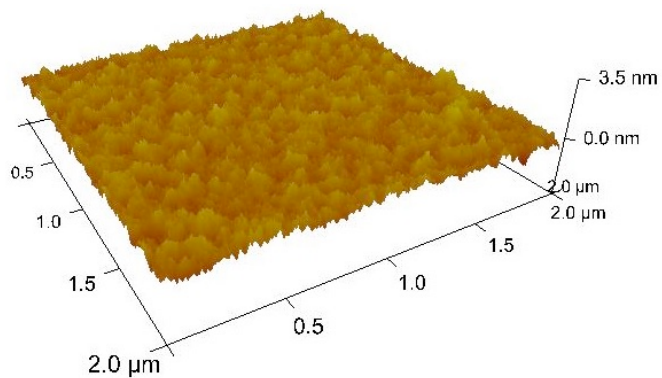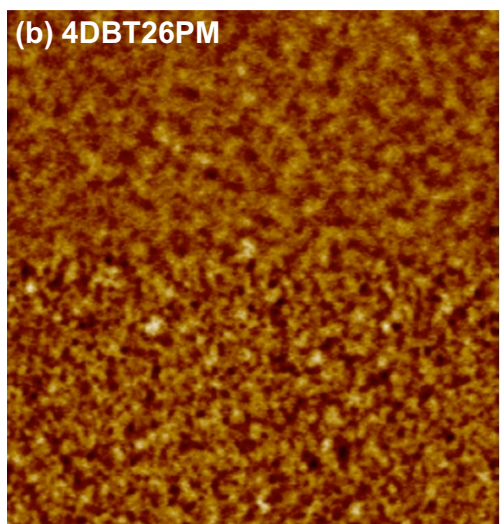

**Ra = 0.235 nm**

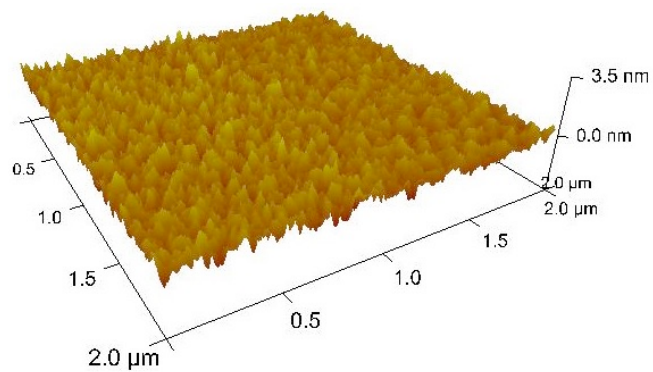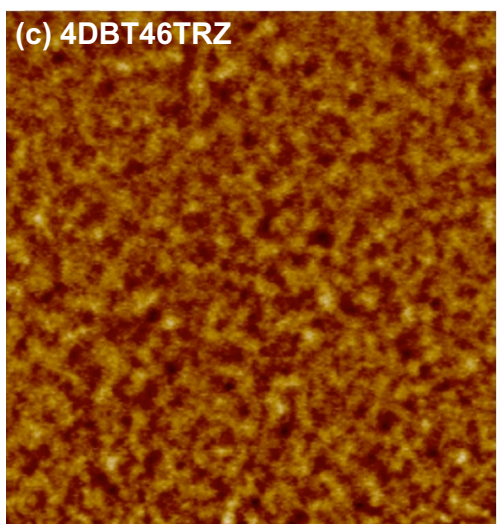

**Ra = 0.216 nm**

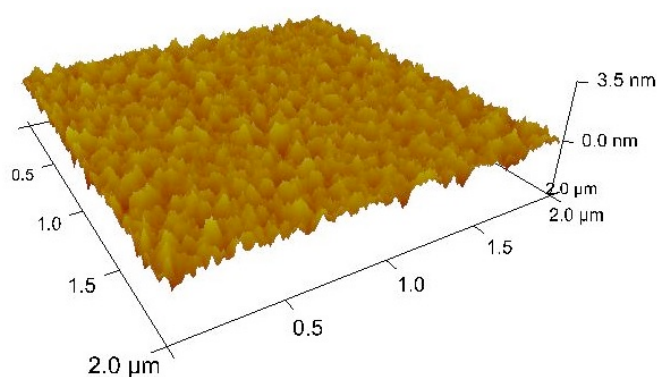

**Fig. S2** AFM 2D and 3D image; (a) 4DBT46PM, (b)4DBT26PM, and (c) 4DBT46TRZ.

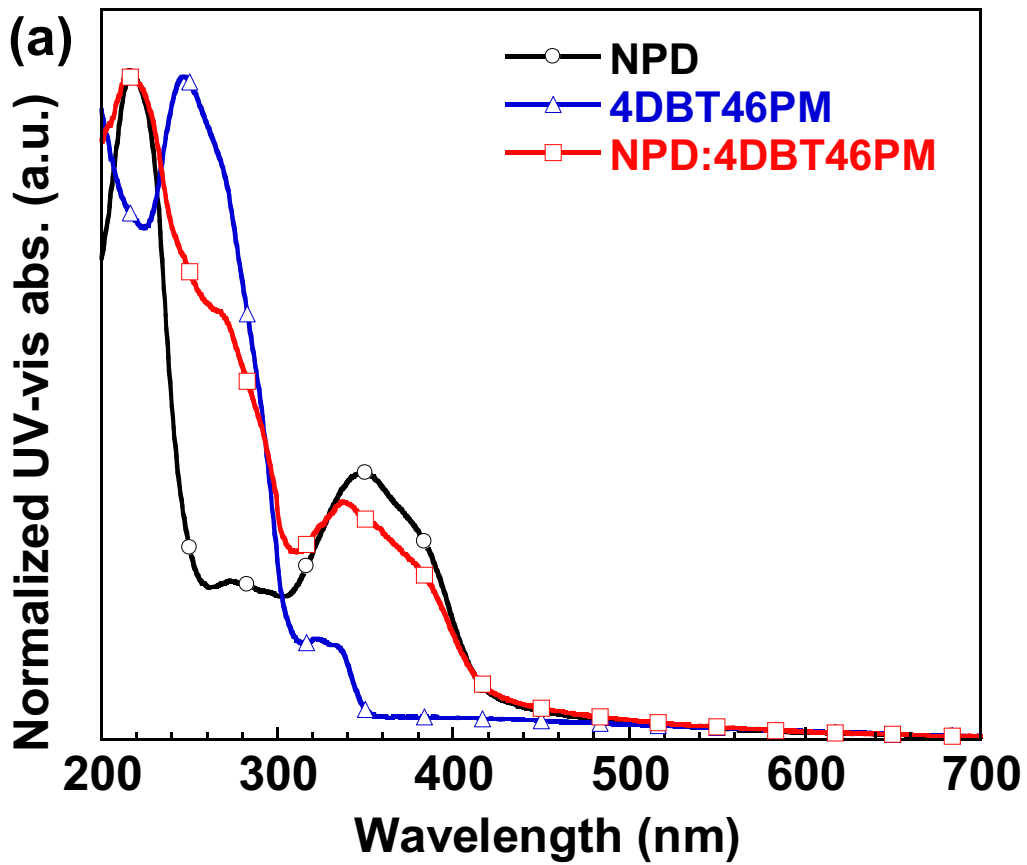



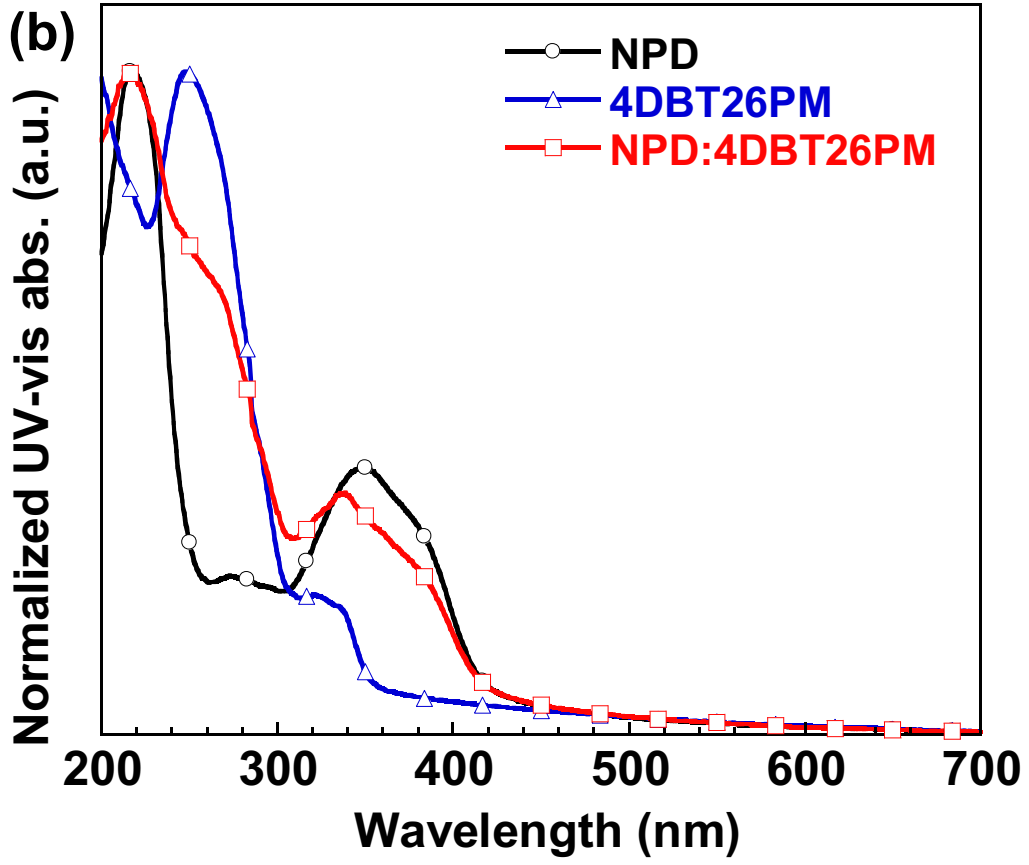

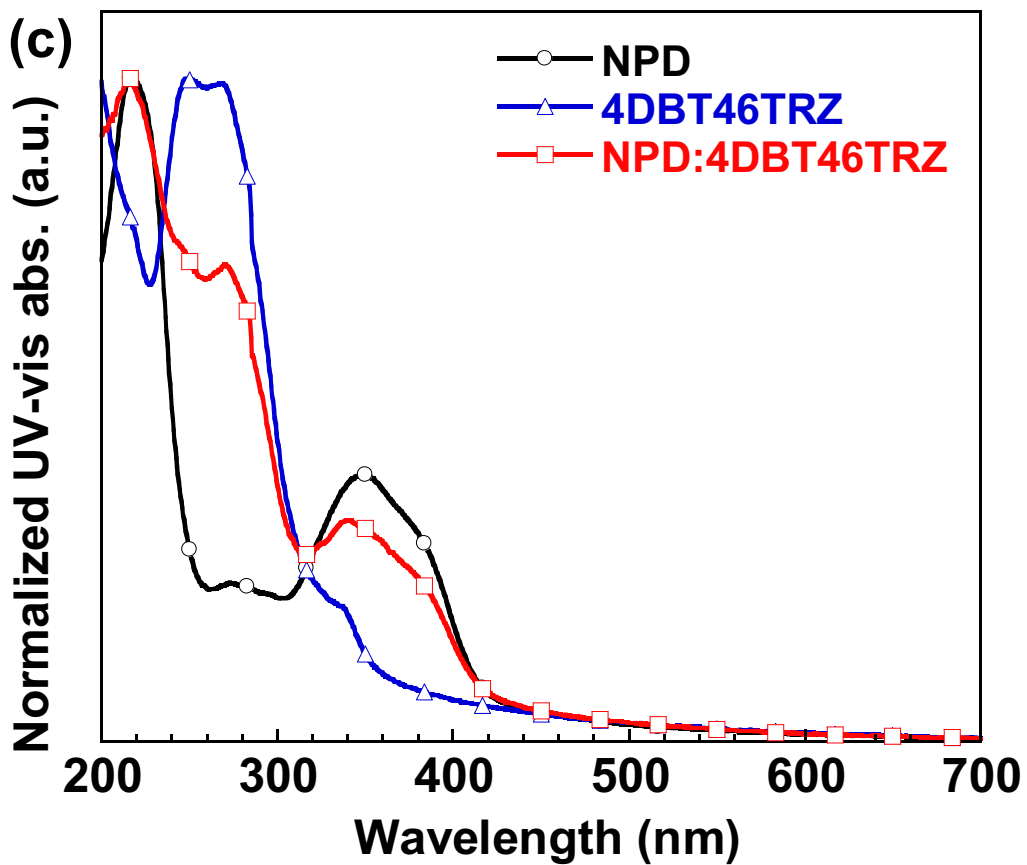

Fig. S3 UV-vis absorption spectra of (a) 4DBT46PM, (b) 4DBT26PM, and (c) 4DBT46TRZ.

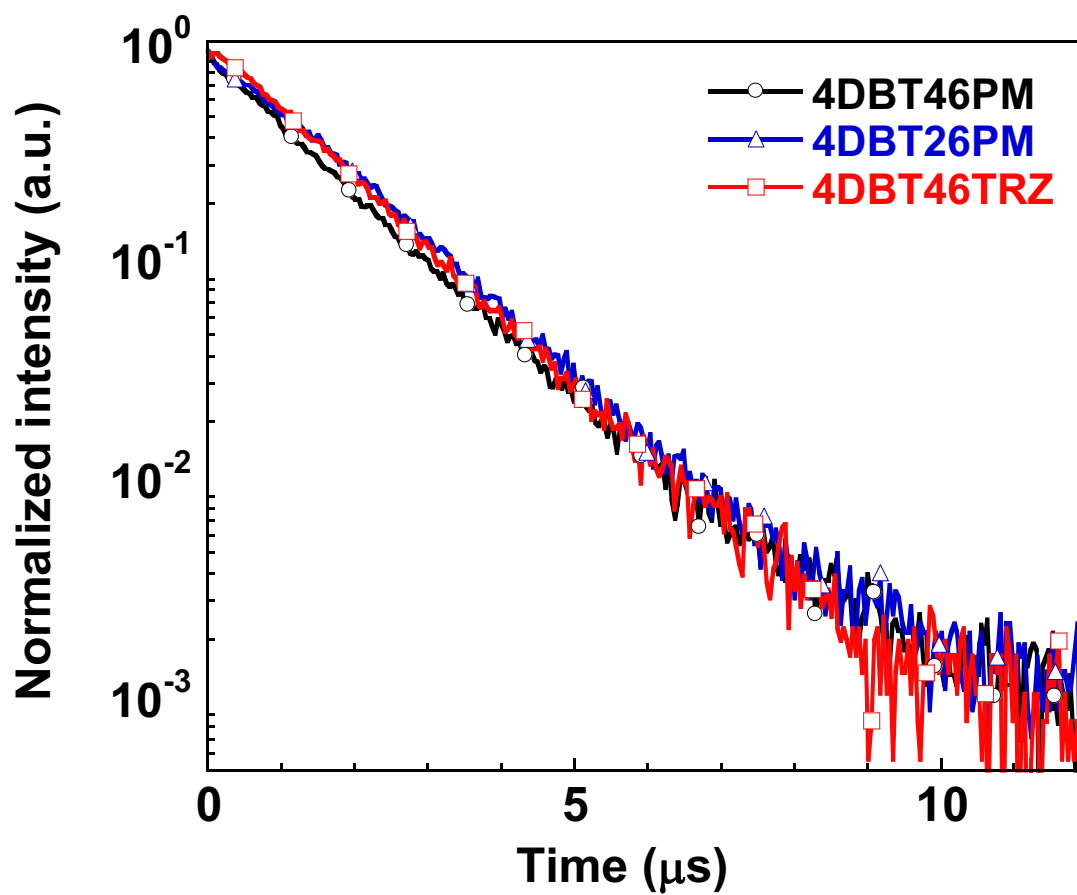

Fig. S4 Photoluminescence decay curves of the 1 wt%  $(\text{DPQ})_2\text{Ir}(\text{dpm})$  doped NPD:DBT-azine derivative film at room temperature.

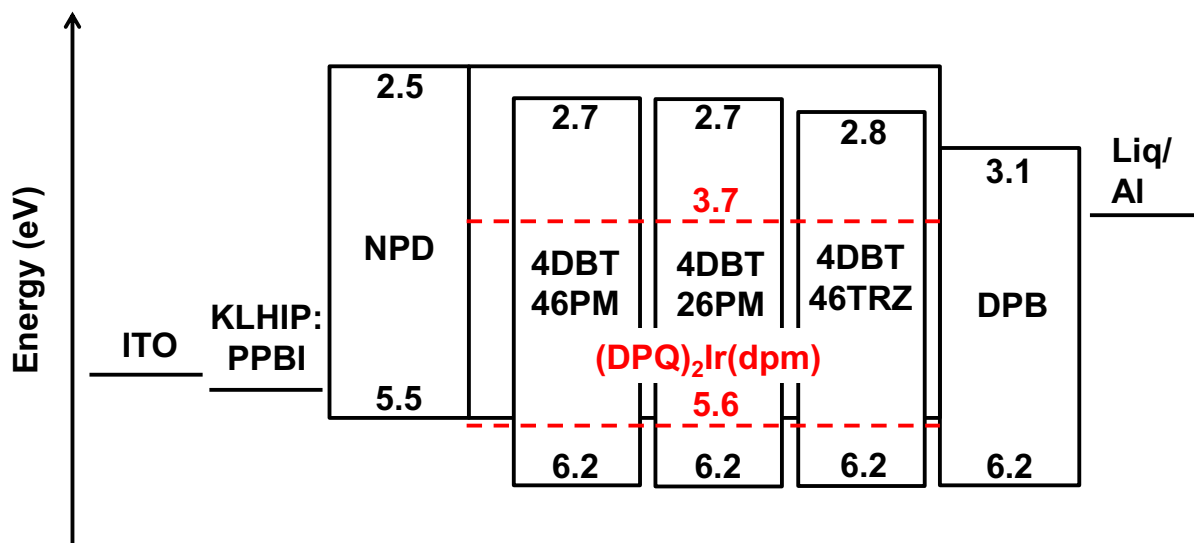

Fig. S5. Energy diagram of deep-red phosphorescent OLEDs.

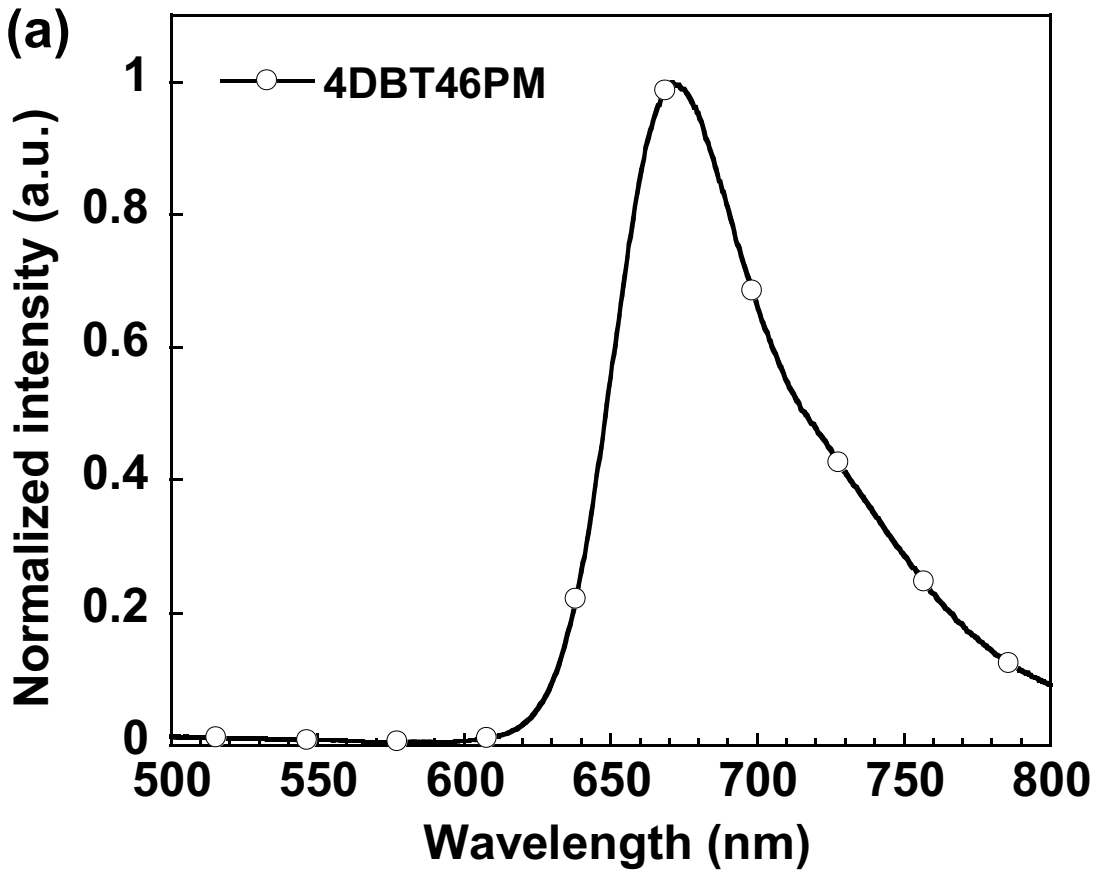

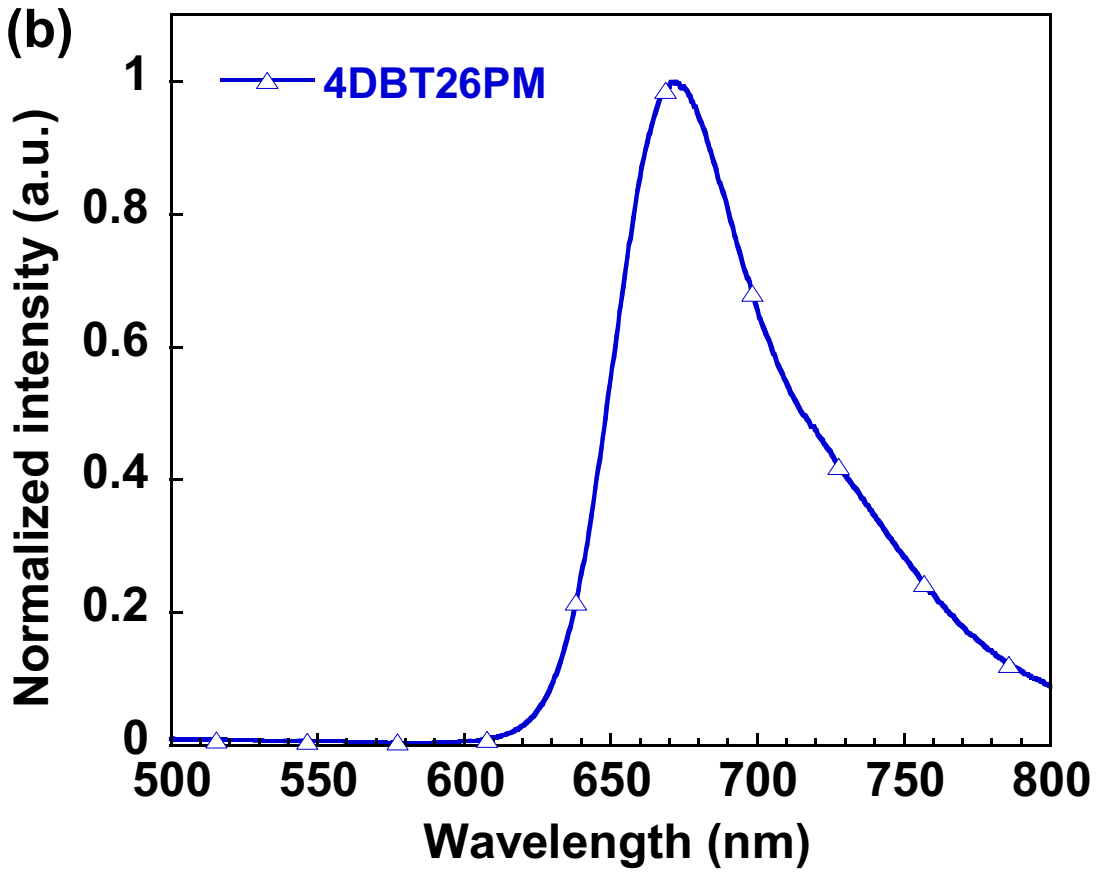

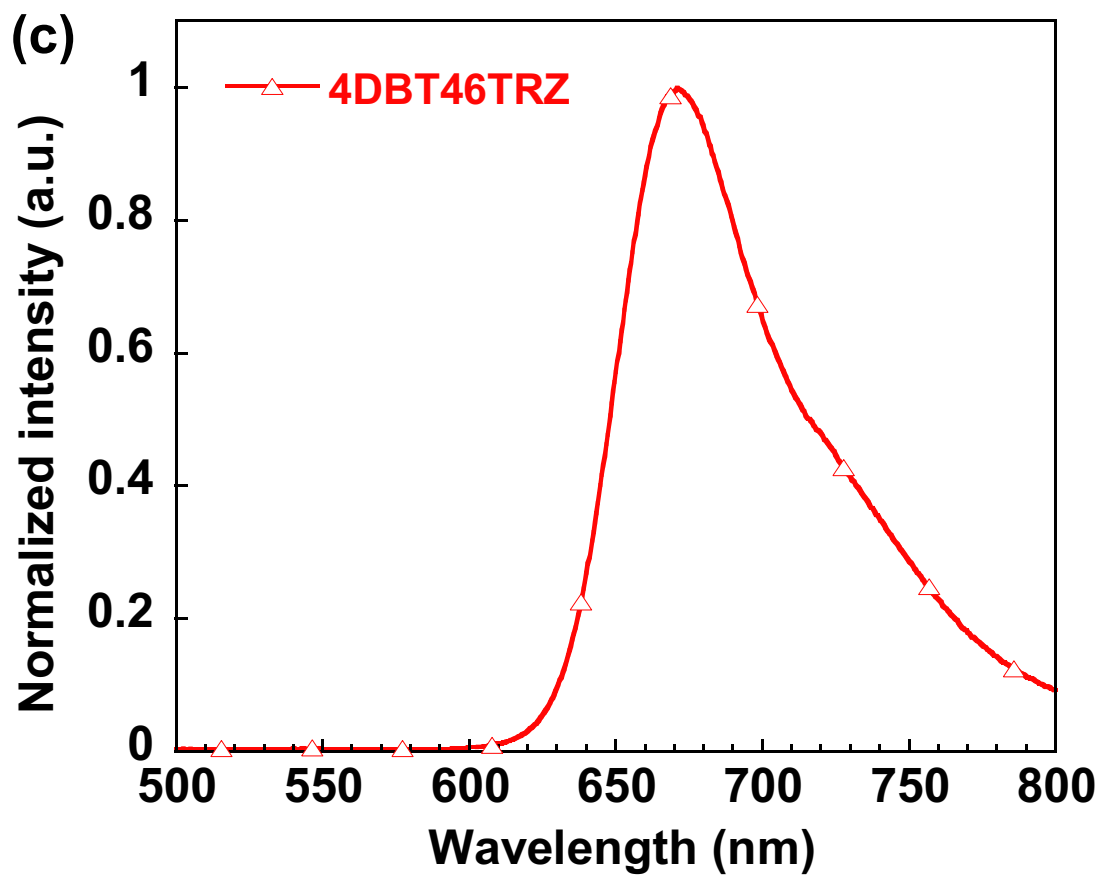

Fig. S6. EL spectra of deep-red phosphorescent OLEDs; (a) 4DBT46PM, (b)4DBT26PM and (c) 4DBT46TRZ.

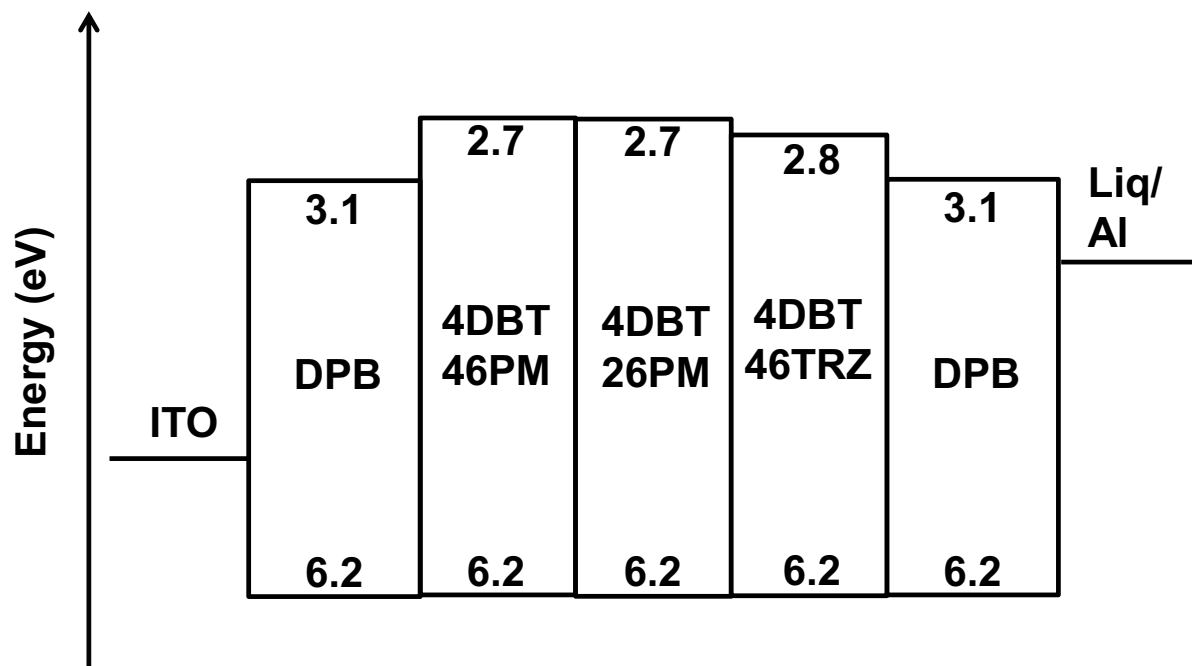

**Fig. S7.** Energy diagram of electron only device.



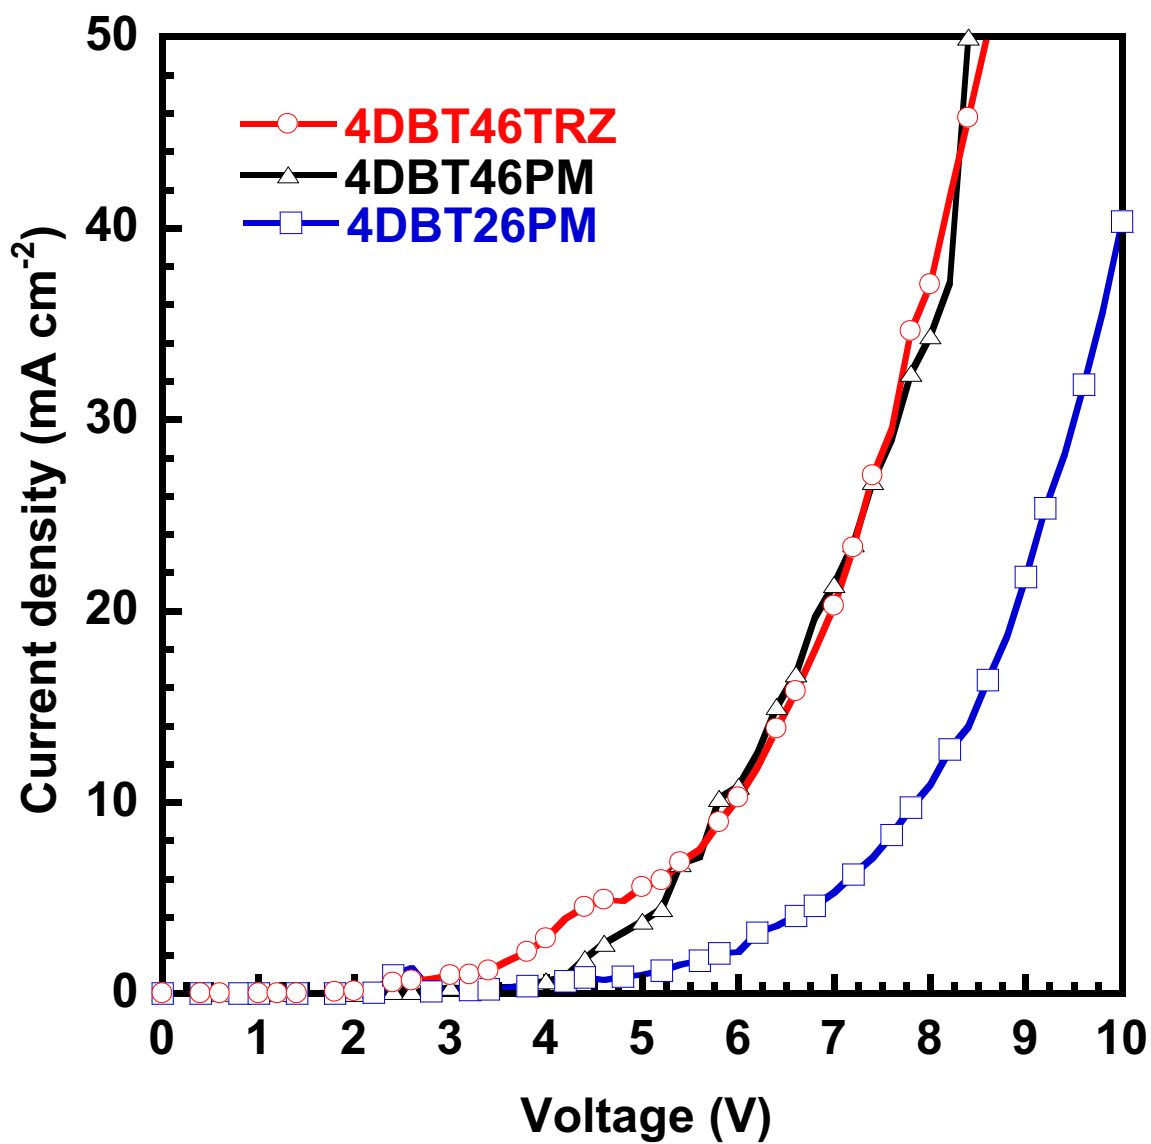

Fig. S8. J-V characteristics of electron only device.

Table S1. Summary of the performances in deep-red OLEDs.

|           | $\lambda_{\text{EL}}$<br>[nm] | $V_{\text{on}}$<br>[V] | $\text{EQE}_{\text{max}}$<br>[%] |
|-----------|-------------------------------|------------------------|----------------------------------|
| This work | 671                           | 2.61                   | 15.0                             |
|           | 671                           | 3.66                   | 16.6                             |
|           | 671                           | 2.41                   | 17.9                             |
| Ref 5a    | 675                           | -                      | 10.2                             |
| Ref 5b    | 688                           | 3.0                    | 11.2                             |
| Ref 5c    | 668                           | -                      | 9.8                              |
| Ref 5d    | 657, 730                      | -                      | 8.2                              |
| Ref 5e    | 666                           | 3.2                    | 1.36                             |
|           | 662                           | 3.7                    | 1.66                             |
|           | 657                           | 3.6                    | 2.09                             |
| Ref 5f    | ca. 610                       | ca. 3.7 V              | 16                               |
|           | ca. 750                       | -                      | 5                                |
